# Supplementary material for: Deep learning of electrochemical CO2 conversion literature reveals research trends and directions
Source: Royal Society of Chemistry journal article supplement (doi:10.1039/d3ta02780e), 2023-01-01
Supplement: d3ta02780e1.pdf [file d3ta02780e1.pdf]

Supporting information for

## **Deep Learning of Electrochemical CO<sub>2</sub> Conversion Literature Reveals Research Trends and Directions**

*Jiwoo Choi,<sup>1,2,+</sup> Kihoon Bang<sup>1,+</sup>, Suji Jang,<sup>1</sup> Jaewoong Choi,<sup>1</sup> Juanita Ordonez,<sup>3</sup> David Buttler,<sup>3</sup>  
Anna Hiszpanski,<sup>3</sup> T. Yong-Jin Han,<sup>3</sup> Seok Su Sohn,<sup>2</sup> Byungju Lee,<sup>1</sup> Kwang-Ryeol Lee,<sup>1</sup> Sang  
Soo Han<sup>1,\*</sup>, Donghun Kim<sup>1,\*</sup>*

<sup>1</sup>Computational Science Research Center, Korea Institute of Science and Technology, Seoul  
02792, Republic of Korea

<sup>2</sup>Department of Materials Science and Engineering Korea University, Seoul 02841, Republic of  
Korea

<sup>3</sup>Materials Science Division, Lawrence Livermore National Laboratory, Livermore, CA, USA

†These authors contributed equally.

\*Correspondence to: Dr. Donghun Kim([donghun@kist.re.kr](mailto:donghun@kist.re.kr)), Dr. Sang Soo Han  
([sangsoo@kist.re.kr](mailto:sangsoo@kist.re.kr))

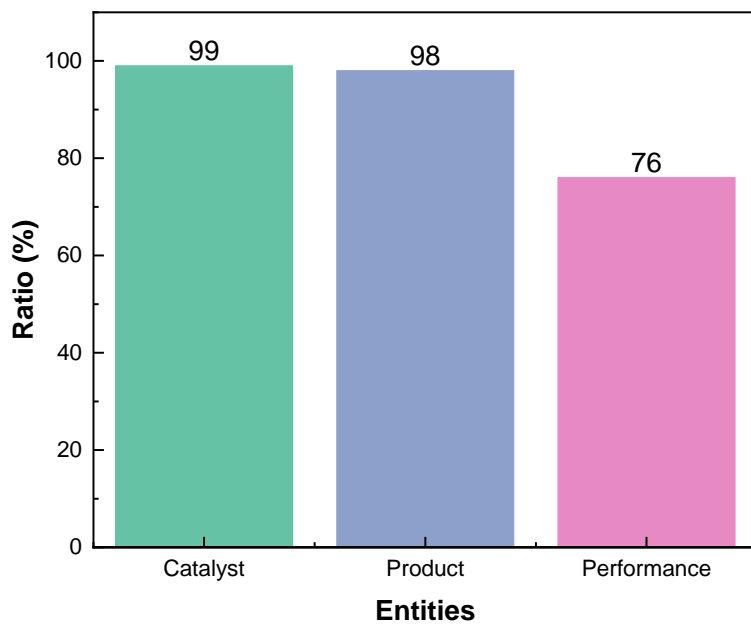

**Figure S1.** Analysis of major entities present in the abstract. The analysis was done on 100 papers randomly selected. Performance entities include faradaic efficiency, current density, onset potential, overpotential, stability hour and turnover frequency.

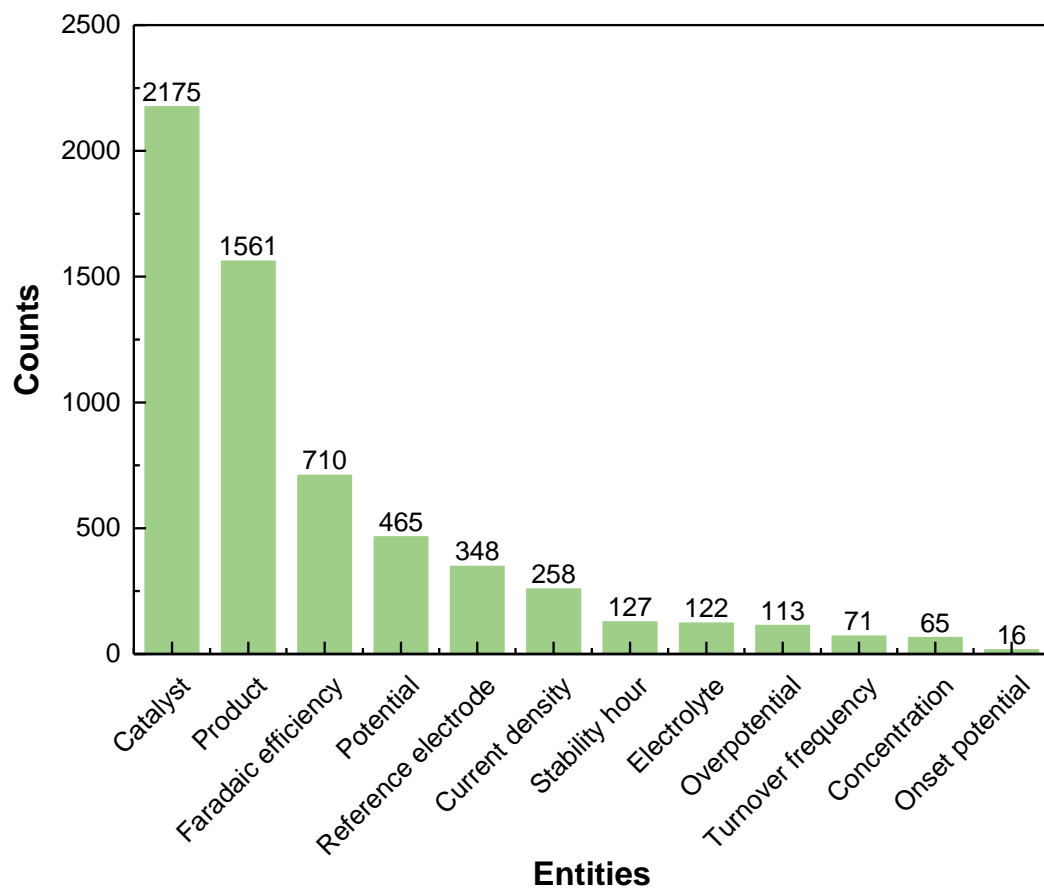

**Figure S2.** Counts by entity in 500 annotated abstracts used for NER.

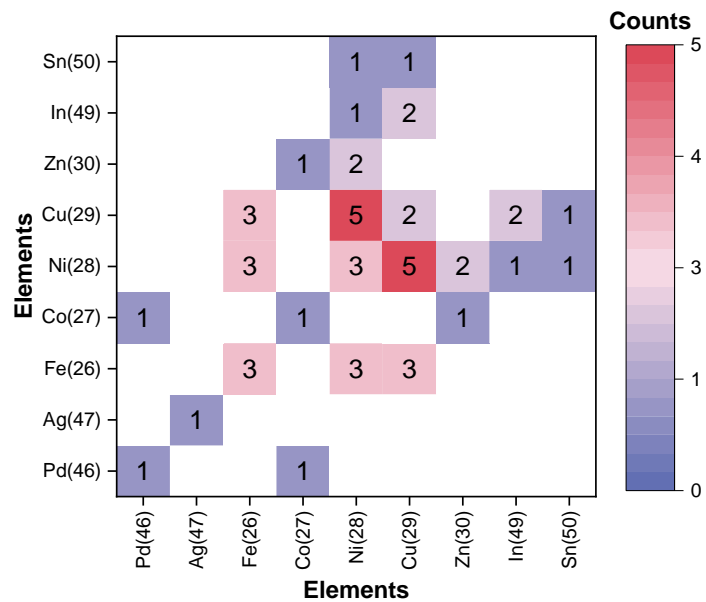

**Figure S3.** Analysis of catalyst element combinations from the dual-atom catalyst literature. The analysis was done on 32 dual-atom catalyst papers. The redder the color, the more prevalent the combination of that element.

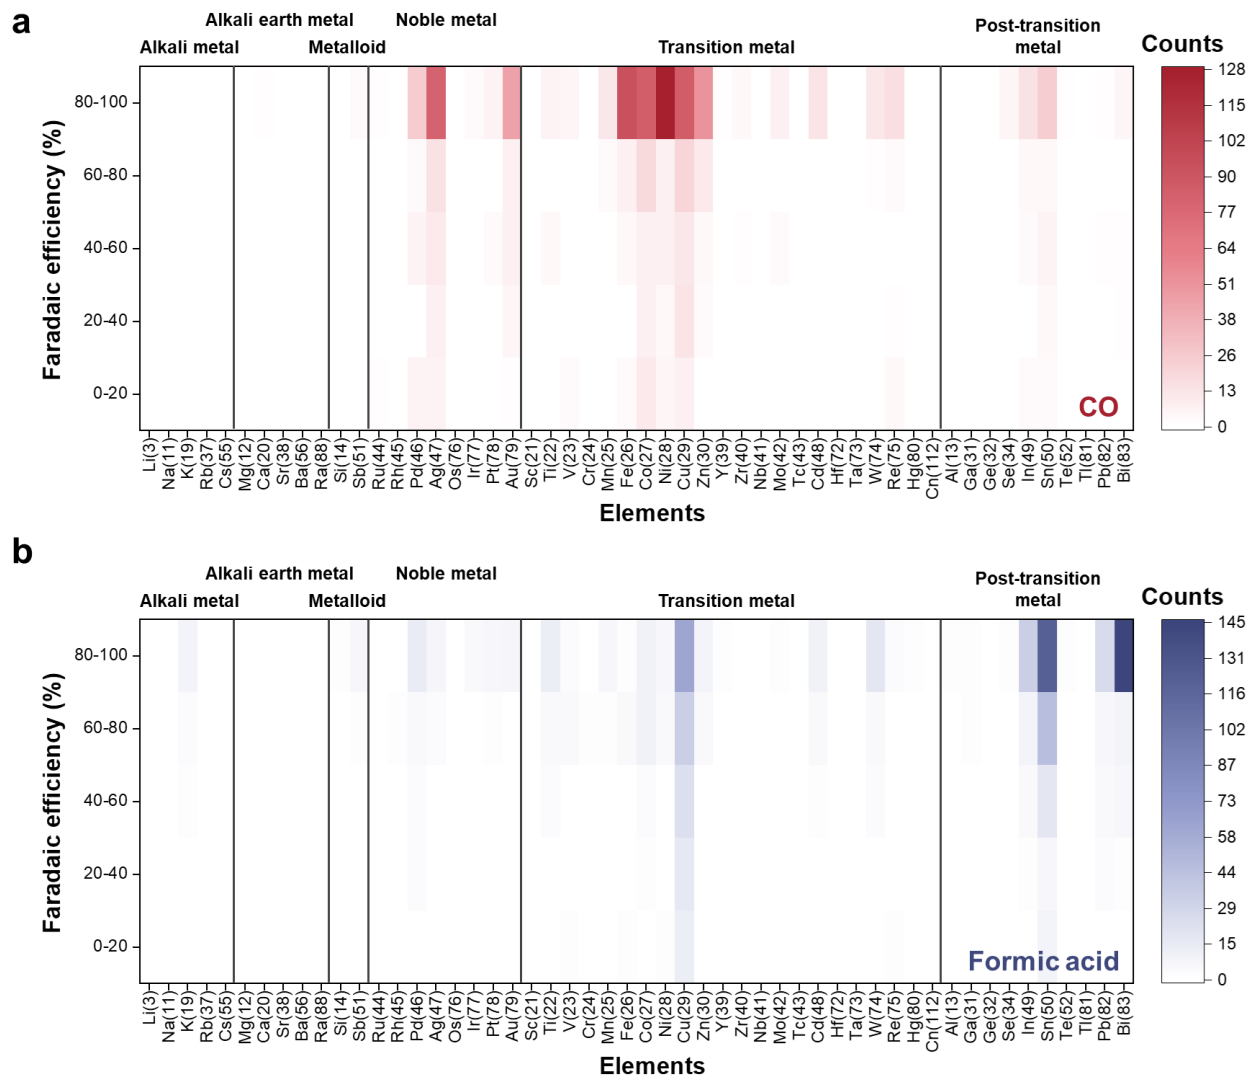

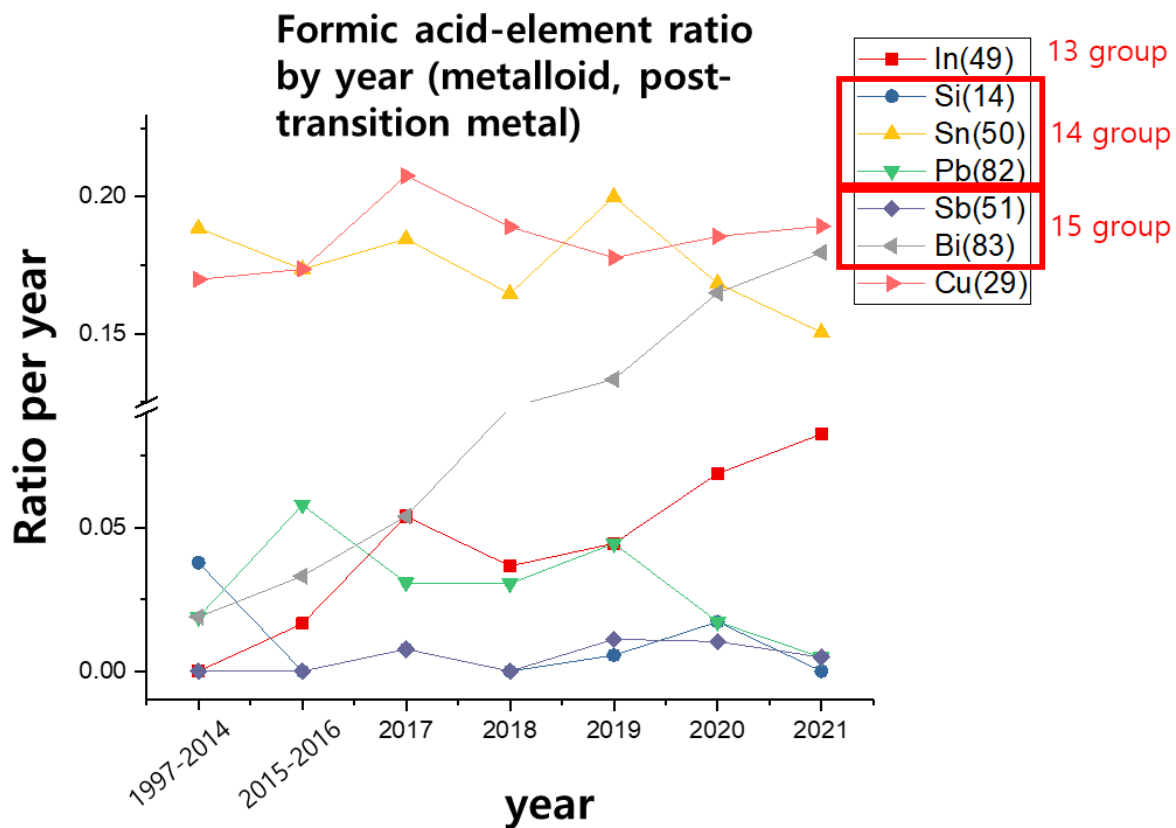

Figure S5. Ratio of metalloids and transition metals that produce formic acid by year

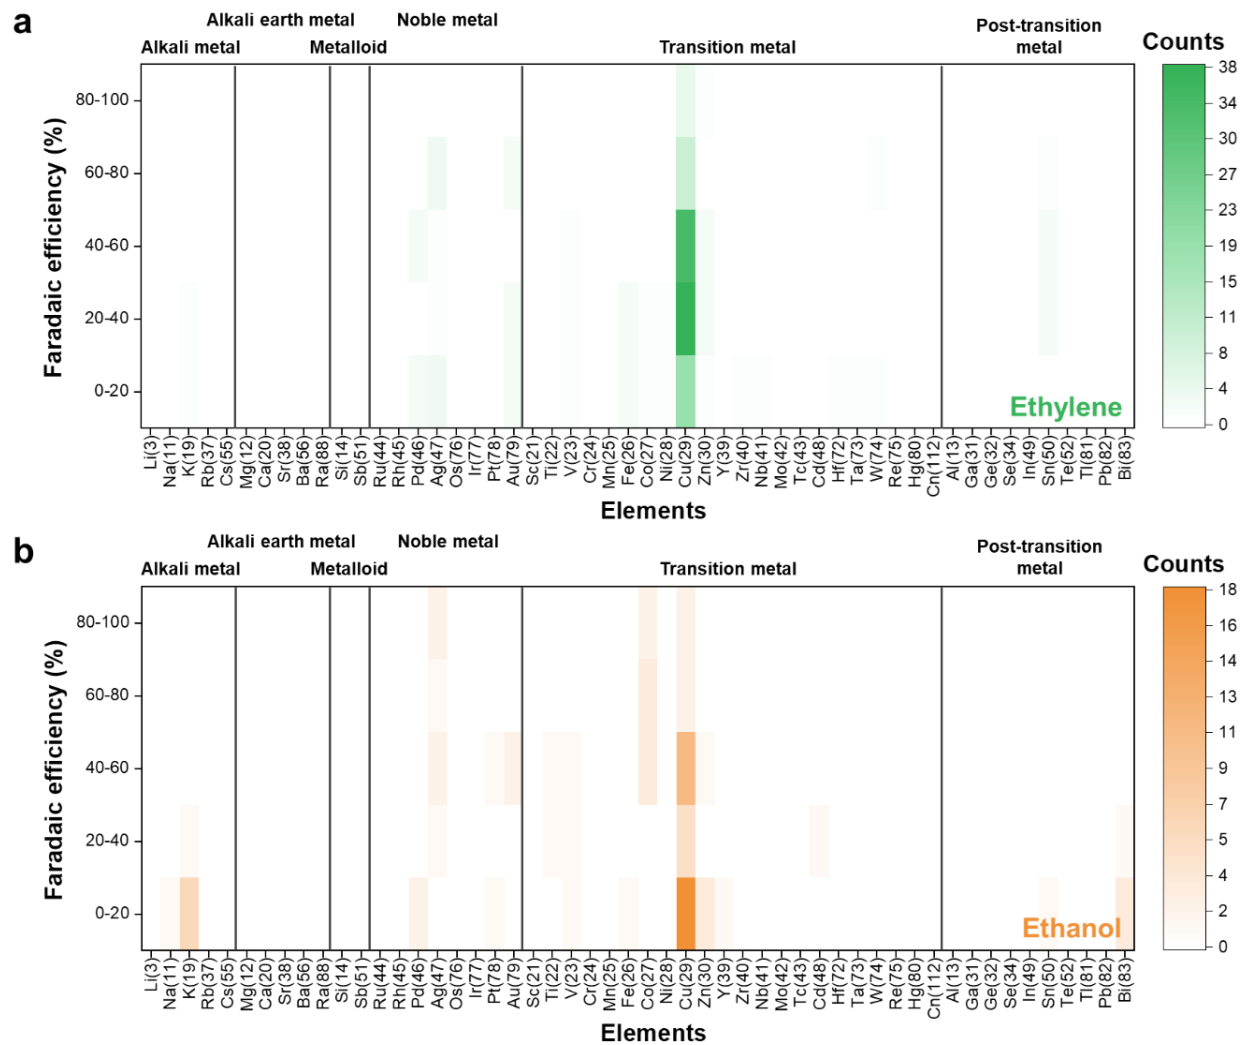

**Figure S6.** Analysis of Faradaic efficiency values per catalyst element used to generate C2 products. (a) Ethylene (b) Ethanol





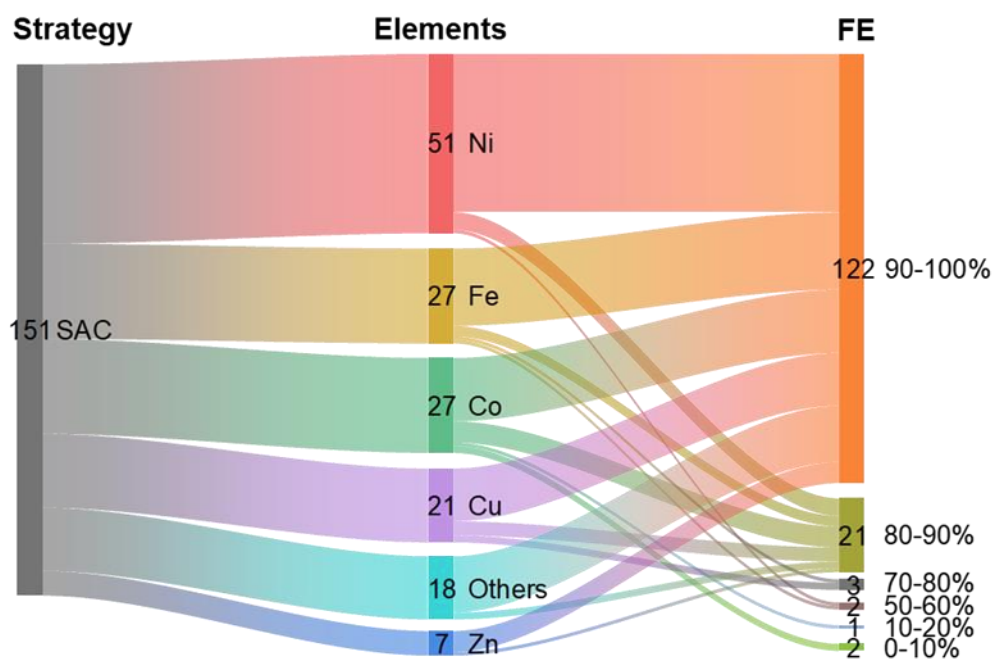

**Figure S8.** Distribution of 151 SAC papers (for CO productions) connected over used elements and FE ranges. The thicker the connected lines, the higher the corresponding ratio.

**Table S1.** Examples of annotations by the researcher for each entity in the 500 abstracts used for NER training.

| Entity                     | Example                                                                                                                                                                                                                                                   |
|----------------------------|-----------------------------------------------------------------------------------------------------------------------------------------------------------------------------------------------------------------------------------------------------------|
| <b>Catalyst</b>            | “copper”, “N-doped hieratically porous carbon”, “MFM-300(In)/carbon-paper electrodes)”, “Pd@Ag cubes”, “Ni-N@NPC”, “Fe, N-co-doped porous carbon nanoparticles”, “Ni-N3-V SAC”, “Cu/Cd composite electrode”, “Porous Pd-In catalyst”, “Bi5Sn60 electrode” |
| <b>Product</b>             | “carbon monoxide”, “CO”, “formic acid”, “C2 products”, “acetic acid”, “acetate”, “CO32-“, “CH3OH”, “HCOOH”                                                                                                                                                |
| <b>Electrolyte</b>         | “KHCO3”, “ChI”, “aqueous ammonia”, “KCl”, “reline”, “K2SO4”, “NaHCO3”, “KOH”                                                                                                                                                                              |
| <b>Reference electrode</b> | “RHE”, “reversible hydrogen electrode”, “Ag/Ag+”, “Ag/AgCl”, “FeCp2+/0”, “Fc/Fc+”                                                                                                                                                                         |
| <b>Current density</b>     | “-9.0 mA/cm2”, “46.1 mAcm-2”, “210 mA · cm-2”, “121.4 mAmg-1”                                                                                                                                                                                             |
| <b>Faradaic efficiency</b> | “83%”, “over 60%”, “>90%”, “around 81%”, “nearly 96%”, “~85%”, “96 ±8”, “≈95%”, “96 ±8%”, “above 90%”                                                                                                                                                     |
| <b>Stability hour</b>      | “20 h”, “30 hours”, “>24h”, “over 35 hours”                                                                                                                                                                                                               |
| <b>Turnover frequency</b>  | “1.3 × 104 h-1”, “1622 h-1”, “2100s-1”, “5.7±0.1s-1”, “1.4 × 105 s-1”                                                                                                                                                                                     |
| <b>Overpotential</b>       | “110mv”, “150mv”, “-0.49V”                                                                                                                                                                                                                                |
| <b>Onset potential</b>     | “-0.8V”, “-0.35”, “-1.0V”                                                                                                                                                                                                                                 |
| <b>Potential</b>           | “-0.9V”, “-1.3V”, “-1.1V”, “-2.15V”                                                                                                                                                                                                                       |
| <b>Concentration</b>       | “0.1 M”, “0.1m”, “1 molL-1”, “5 mM”                                                                                                                                                                                                                       |

**Table S2.** 11 LDA topics and words constituting the topic. Topics in red relate to noise, topics in green relate to CO<sub>2</sub>RR, topics in blue relate to DFT, and topics in purple relate to analysis.

|                 |                                                                                                                                                                                                                                                                                                                                                              |
|-----------------|--------------------------------------------------------------------------------------------------------------------------------------------------------------------------------------------------------------------------------------------------------------------------------------------------------------------------------------------------------------|
| <b>Topic 1</b>  | 'oer', 'mv', 'cm-2', 'evolution', 'water', 'oxygen', '10', 'activity', 'low', 'hydrogen', 'currunt', 'density', 'overpotential', 'metal', 'HER', 'electrocatalysts', 'performance', 'alkaline', 'splitting', 'Co', 'stability', 'efficient', 'catalytic', 'exhibit', 'bifunctional', 'active', 'electrode', 'Ni', 'highly', 'cobalt'                         |
| <b>Topic 2</b>  | 'atom', 'single', 'metal', 'Ni', 'CO', 'site', 'calculation', 'activity', 'active', 'functional', 'Fe', 'catalytic', 'theory', 'low', 'energy', 'Co', 'coordination', 'hydrogen', 'density', 'potential', 'dft', 'intermediate', 'step', 'overpotential', 'mechanism', 'MoS2', 'ligand', 'transition', 'result', 'evolution'                                 |
| <b>Topic 3</b>  | 'surface', 'site', 'active', 'structure', 'activity', 'oxygen', 'electronic', 'charge', 'performance', 'electron', 'vacancy', 'enhance', 'adsorption', 'improve', 'transfer', 'nanosheets', 'density', 'strategy', 'calculation', 'interface', 'defect', 'result', 'design', 'reveal', 'herein', 'provide', 'functional', 'engineering', 'promote', 'state'  |
| <b>Topic 4</b>  | 'energy', 'solar', 'light', 'system', 'TiO2', 'efficiency', 'conversion', 'water', 'photoelectrochemical', 'production', 'chemical', 'fuel', 'PEC', 'process', 'hydrogen', 'use', 'device', 'cell', 'photocathode', 'film', 'H2', 'photocurrent', 'photoanode', 'array', 'photocatalytic', 'visible', 'renewable', 'semiconductor', 'demonstrate', 'produce' |
| <b>Topic 5</b>  | 'carbon', 'metal', 'electrocatalysts', 'activity', 'performance', 'active', 'dope', 'base', 'efficient', 'material', 'strategy', 'site', 'nitrogen', 'porous', 'Zn', 'efficiency', 'catalytic', 'highly', 'herein', 'co2rr', 'framework', 'design', 'work', 'electrocatalytic', 'structure', 'conversion', 'exhibit', 'stability', 'report', 'organic'       |
| <b>Topic 6</b>  | 'electrode', 'material', 'g-1', 'carbon', 'battery', 'specific', 'performance', 'energy', 'surface', 'density', 'area', 'capacitance', 'cycle', 'stability', 'composite', 'graphene', 'capacity', 'storage', 'excellent', 'charge', 'porous', 'air', 'rgo', 'structure', 'use', 'exhibit', 'application', 'ion', 'large', 'Ni'                               |
| <b>Topic 7</b>  | 'complex', 'use', 'oxidation', 'spectroscopy', 'electron', 'electrode', 'study', 'catalytic', 'x-ray', 'show', 'surface', 'water', 'potential', 'solution', 'electrocatalytic', 'oxide', 'result', 'activity', 'base', 'voltammetry', 'film', 'analysis', 'ph', 'formation', 'condition', 'two', 'microscopy', 'investigate', 'cyclic', 'observe'            |
| <b>Topic 8</b>  | 'cell', 'electrode', 'use', 'electrolyte', 'Pt', 'carbon', 'gas', 'methanol', 'cathode', 'fuel', 'increase', 'product', 'acid', 'current', 'membrane', 'temperature', 'potential', 'electrolysis', 'study', 'condition', 'result', 'low', 'rate', 'liquid', 'mass', 'concentration', 'process', 'oxidation', 'base', 'CO'                                    |
| <b>Topic 9</b>  | 'efficiency', 'faradaic', 'formate', 'electrode', 'current', 'density', 'CO', 'cm-2', 'selectivity', 'rhe', 'fe', 'electroreduction', 'production', 'potential', 'Ag', 'Sn', 'product', 'bi', 'carbon', 'hydrogen', 'reversible', 'conversion', 'selective', 'achieve', 'low', 'exhibit', 'copper', 'versus', 'efficient', 'dioxide'                         |
| <b>Topic 10</b> | 'nrr', 'N2', 'NH3', 'yield', 'ammonia', 'nitrogen', 'ambient', 'condition', 'efficiency', 'h-1', 'faradaic', 'hydrogen', 'process', 'rate', 'synthesis', 'µg', '0.1', 'production', 'energy', 'fixation', 'report', 'electrocatalysts', 'efficient', 'electrocatalytic', 'achieve', 'electrode', 'reversible', 'electrocatalyst', 'rhe', 'Ru'                |
| <b>Topic 11</b> | 'Cu', 'surface', 'CO', 'selectivity', 'co2rr', 'product', 'Au', 'Pd', 'activity', 'show', 'nanoparticles', 'Ag', 'formation', 'np', 'size', 'copper', 'intermediate', 'alloy', 'structure', 'production', 'use', 'potential', 'result', 'ethanol', 'carbon', 'effect', 'CH4', 'low', 'c2', 'catalytic'                                                       |

**Table S3.** Comparison of major entities present in the abstract and the main text. Data highlighted in yellow represent the catalysts with the best performance in the paper.

|         | Type      | Catalyst                                                          | Product            | Performance                     |
|---------|-----------|-------------------------------------------------------------------|--------------------|---------------------------------|
| Paper 1 | Abstract  | <b>N-doped hieratically porous carbon</b>                         | <b>CO</b>          | <b>83%</b>                      |
|         | Main text | <b>NH3 etched DAPC (NDAPC)</b>                                    | <b>CO</b>          | <b>83%</b>                      |
|         |           | Deasphalted petroleum pitch-based carbon (DAPC)                   | CO                 | 52%                             |
|         |           | NH3 etched PC (NPC)                                               | CO                 | 53%                             |
|         |           | Petroleum pitch-based carbon (PC)                                 | CO                 | 38%                             |
| Paper 2 | Abstract  | <b>polyoxometalate (SiW11Mn)-assisted metal In</b>                | <b>acetic acid</b> | <b>72.10%</b>                   |
|         |           |                                                                   | formic acid        | 6.10%                           |
|         | Main text | <b>Indium electrode</b>                                           | <b>acetic acid</b> | <b>72.10%</b>                   |
|         |           |                                                                   | formic acid        | 6.10%                           |
| Paper 3 | Abstract  | <b>Catalyst 1-Mn (ortho-)</b>                                     | <b>CO</b>          | <b>901 s<sup>-1</sup></b>       |
|         |           | catalyst Mn(bpy)(CO)3Br                                           | CO                 | 102 s <sup>-1</sup>             |
|         | Main text | <b>1-Mn</b>                                                       | <b>CO</b>          | <b>901.4 s<sup>-1</sup></b>     |
|         |           | 2-Mn                                                              | CO                 | 245.2 s <sup>-1</sup>           |
|         |           | 3-Mn                                                              | CO                 | 296 s <sup>-1</sup>             |
|         |           | MnBpy                                                             | CO                 | 102.1 s <sup>-1</sup>           |
| Paper 4 | Abstract  | <b>Catalyst films with the highest sulfur content of 2.7 at %</b> | <b>formate</b>     | <b>-13.9 mA cm<sup>-2</sup></b> |
|         | Main text | <b>Cu-5000S</b>                                                   | <b>formate</b>     | <b>-13.9 mA cm<sup>-2</sup></b> |
|         |           | Cu-0S                                                             | formate            | -1.8 mA cm <sup>-2</sup>        |
| Paper 5 | Abstract  | <b>Cu-Sn alloy</b>                                                | <b>CO</b>          | <b>90%</b>                      |
|         |           | OD-Cu                                                             | CO                 | 63%                             |
|         | Main text | <b>Cu-Sn</b>                                                      | <b>CO</b>          | <b>90%</b>                      |
|         |           | OD-Cu                                                             | CO                 | 63%                             |
|         |           | Sn deposited on Sn                                                | CO                 | -                               |

**Table S4.** Performance change of MatBERT according to the tag format (IOB, IOBE, IOBES). Tenfold crossvalidation was performed. The performance is represented by the F1-score, which is expressed as a %. The best performance is indicated by red text.

| Entity \ Tag format | IOB   | IOBE  | IOBES |
|---------------------|-------|-------|-------|
| Catalyst            | 80.16 | 80.59 | 80.67 |
| Concentration       | 91.71 | 90.52 | 93.98 |
| Current density     | 96.35 | 94.72 | 94.96 |
| Electrolyte         | 81.6  | 82.98 | 79.72 |
| Faradaic efficiency | 96.65 | 95.94 | 96.72 |
| Onset potential     | 62.12 | 68.08 | 88.76 |
| Overpotential       | 93.45 | 94.15 | 93.89 |
| Potential           | 98.34 | 97.97 | 98.32 |
| Product             | 96.19 | 96.22 | 96.19 |
| Reference electrode | 99.07 | 99.4  | 99.58 |
| Stability hour      | 93.85 | 90.79 | 92.79 |
| Turnover frequency  | 95.32 | 96.74 | 92.5  |
| Micro average       | 90.23 | 90.28 | 90.38 |

**Table S5.** 10-fold cross-validation result for NER. The value represents F-1 score, which is expressed as a %. 500 abstracts were used as a trainset for NER. A hyphen indicates that the entity does not exist in the test set of the corresponding fold. The lowest performance is indicated by red text.

| <b>Entity \ Fold</b>       | <b>1</b> | <b>2</b> | <b>3</b> | <b>4</b> | <b>5</b> | <b>6</b> | <b>7</b> | <b>8</b> | <b>9</b> | <b>10</b> | <b>Average</b> |
|----------------------------|----------|----------|----------|----------|----------|----------|----------|----------|----------|-----------|----------------|
| <b>Catalyst</b>            | 84.4     | 81       | 78.5     | 79.2     | 82.8     | 81.7     | 77.6     | 78.9     | 82.3     | 80.3      | <b>80.7</b>    |
| <b>Concentration</b>       | 100      | 100      | 100      | 100      | 91       | 71.4     | 100      | 83.3     | 100      | 94.1      | 94             |
| <b>Current density</b>     | 100      | 94.1     | 94.1     | 97.1     | 100      | 91.3     | 91.7     | 100      | 90.4     | 90.9      | 94.5           |
| <b>Electrolyte</b>         | 71.4     | 87       | 96.6     | 76.2     | 72.7     | 92.3     | 85.7     | 84.9     | 62.1     | 68.4      | 79.7           |
| <b>Faradaic efficiency</b> | 98.6     | 97.6     | 99.4     | 96.6     | 95       | 97.8     | 95.8     | 96.2     | 95.2     | 95        | 96.7           |
| <b>Onset potential</b>     | 75       | 100      | 66.7     | 100      | 100      | 100      | 57.1     | 100      | 100      | -         | 88.8           |
| <b>Overpotential</b>       | 93.8     | 84.6     | 80       | 94.1     | 100      | 100      | 100      | 92.3     | 100      | 94.1      | 93.9           |
| <b>Potential</b>           | 100      | 100      | 93.1     | 99.2     | 98.8     | 100      | 100      | 97.3     | 98.5     | 96.3      | 98.3           |
| <b>Product</b>             | 97.3     | 98.4     | 95.6     | 94.8     | 96.2     | 95.8     | 96.3     | 96       | 96.1     | 95.5      | 96.2           |
| <b>Reference electrode</b> | 100      | 100      | 97.4     | 100      | 100      | 100      | 100      | 100      | 100      | 98.4      | 99.6           |
| <b>Stability hour</b>      | 85.7     | 92.3     | 90       | 94.1     | 87       | 88.9     | 93.3     | 96.6     | 100      | 100       | 92.8           |
| <b>Turnover frequency</b>  | 100      | 85.7     | 88.9     | 100      | 87.5     | 89.7     | 82.4     | 90.9     | 100      | 100       | 92.5           |
| <b>Micro average</b>       | 92.8     | 91       | 89.8     | 91       | 91.2     | 89.8     | 88.9     | 89.5     | 90.4     | 89.6      | <b>90.4</b>    |

**Table S6.** Results of applying our NER model to 100 abstracts not used for training. The value represents F-1 score, which is expressed as a %. The 100 abstracts are selected randomly. Texts that improved performance when boundary relaxation was applied are shown in red.

| Entity \ F1-score   | Boundary relaxation X | Boundary relaxation O |
|---------------------|-----------------------|-----------------------|
| Catalyst            | 87.5                  | 91.2                  |
| Concentration       | 80                    | 80                    |
| Current density     | 93.6                  | 93.6                  |
| Electrolyte         | 85.7                  | 85.7                  |
| Faradaic efficiency | 91.5                  | 91.5                  |
| Onset potential     | 100                   | 100                   |
| Overpotential       | 93.3                  | 93.3                  |
| Potential           | 98.1                  | 98.1                  |
| Product             | 90.9                  | 92.1                  |
| Reference electrode | 100                   | 100                   |
| Stability hour      | 97.9                  | 97.9                  |
| Turnover frequency  | 100                   | 100                   |
| Micro average       | 90.7                  | 92.5                  |

**Table S7.** How to extract the strategy and the words included in the strategy. Based on the high frequency words in the titles of 3,153 abstracts, 7 strategies and words corresponding to each strategy were manually classified by the researcher.

| Strategy                 | Keywords                                                                                                                                                                                                                                                                                                                                                                                                                                                                                           | Total number |
|--------------------------|----------------------------------------------------------------------------------------------------------------------------------------------------------------------------------------------------------------------------------------------------------------------------------------------------------------------------------------------------------------------------------------------------------------------------------------------------------------------------------------------------|--------------|
| Core shell               | 'shell', 'core'                                                                                                                                                                                                                                                                                                                                                                                                                                                                                    | 130          |
| Defect engineering       | 'vacancy', 'defect', 'amorphous', 'step', 'defective', 'polycrystalline', 'stepped'                                                                                                                                                                                                                                                                                                                                                                                                                | 190          |
| Alloy                    | 'bimetallic', 'alloy', 'ordered', 'metallic', 'intermetallic', 'heteroatom', 'nanoalloys', 'bimetal', 'trimetallic', 'alloyed', 'heterobimetallic', 'multimetallic', 'bi-metallic'                                                                                                                                                                                                                                                                                                                 | 243          |
| Single atom              | 'single', 'dispersed', 'atomically', 'coordinated'                                                                                                                                                                                                                                                                                                                                                                                                                                                 | 248          |
| Doping                   | 'doped', 'doping', 'co-doped', 'codoped', 'co-doping'                                                                                                                                                                                                                                                                                                                                                                                                                                              | 355          |
| Architecture engineering | 'embedded', 'composite', 'decorated', 'assembly', 'coupling', 'nanocomposite', 'encapsulated', 'coated', 'assembled', 'heterostructure', 'heterostructures', 'interfacial', 'integrated', 'nanocomposites', 'coating', 'heterostructured', 'decoration', 'encapsulation', 'heterojunction', 'compositional', 'integration', 'incorporation', 'hetero']                                                                                                                                             | 368          |
| Shape control            | 'nanosheets', 'porous', 'nanotube', 'mesoporous', 'nanoporous', 'nanowire', 'nanosheet', 'nanowires', 'morphology', 'facet', 'dendritic', 'nanorods', 'nanocubes', 'dendrite', 'nanofibers', 'nanorod', 'flower', 'monolayer', 'sheet', 'nanofiber', 'nanoarrays', 'nanoplates', 'monolayers', 'nanocages', 'nanoflake', 'nanodendrites', 'microporous', 'pore', 'leaf', 'nanoflowers', 'honeycomb', 'nanocube', 'sponge', 'nanosponges', 'nanoflakes', 'nanofibbons', 'nanoprisms', 'nanoflower'] | 911          |



**Table S8.** Results of applying our NER model to 32 dual-atom catalyst papers. The value represents F1-score (%). The cases where performances were improved upon boundary relaxation applied were marked in red.

| Entity \ F1-score   | Boundary relaxation X | Boundary relaxation O |
|---------------------|-----------------------|-----------------------|
| Catalyst            | <b>79.56</b>          | <b>85.40</b>          |
| Concentration       | 100.00                | 100.00                |
| Current density     | 100.00                | 100.00                |
| Electrolyte         | 66.67                 | 66.67                 |
| Faradaic efficiency | 93.67                 | 93.67                 |
| Onset potential     | -                     | -                     |
| Overpotential       | 100.00                | 100.00                |
| Potential           | 96.20                 | 96.20                 |
| Product             | <b>92.86</b>          | <b>95.71</b>          |
| Reference electrode | <b>93.02</b>          | <b>97.67</b>          |
| Stability hour      | 100.00                | 100.00                |
| Turnover frequency  | 80.00                 | 80.00                 |
| Micro average       | <b>87.95</b>          | <b>91.15</b>          |

**Table S9.** Performance change of MatBERT according to the batch size. Tenfold cross validation was performed. The performance is represented by the F1-score, which is expressed as a %. The best performance is indicated by red text.

| <b>Batch size</b><br><b>Entity</b> | <b>Batch 4</b> | <b>Batch8</b> | <b>Batch 16</b> | <b>Batch 32 (best)</b> |
|------------------------------------|----------------|---------------|-----------------|------------------------|
| <b>Catalyst</b>                    | 66.65          | 76.05         | 79.31           | <b>80.67</b>           |
| <b>Concentration</b>               | 83.78          | 88.73         | 90.93           | 93.98                  |
| <b>Current density</b>             | 92.76          | 93.98         | 94.89           | 94.96                  |
| <b>Electrolyte</b>                 | 74.03          | 76.72         | 77.16           | 79.72                  |
| <b>Faradaic efficiency</b>         | 92.19          | 93.59         | 94.8            | 96.72                  |
| <b>Onset potential</b>             | 46.91          | 70.37         | 83.89           | 88.76                  |
| <b>Overpotential</b>               | 85.38          | 90.66         | 91.78           | 93.89                  |
| <b>Potential</b>                   | 95.78          | 96.39         | 97.9            | 98.32                  |
| <b>Product</b>                     | 94.2           | 94.78         | 95.83           | 96.19                  |
| <b>Reference electrode</b>         | 98.45          | 99.48         | 99.07           | 99.58                  |
| <b>Stability hour</b>              | 91.43          | 91.07         | 94.57           | 92.79                  |
| <b>Turnover frequency</b>          | 88.23          | 92.92         | 93.95           | 92.5                   |
| <b>Micro average</b>               | 83.46          | 87.63         | 89.5            | <b>90.38</b>           |
